# Supplementary material
Source: PubMed Central journal article supplement (PMC3754646)
Supplement: JCM.00920-13_zjm999092788so1.pdf [file JCM.00920-13_zjm999092788so1.pdf]

TABLE S1 PCR primers used for detection and sequencing of CTX-M, CMY, AmpC, TEM, and SHV type  $\beta$ -lactamases

| Target genes                                          | Forward primer (sequence 5' → 3') | Reverse primer (sequence 5' → 3') | Sequence position |           | PCR product (bp) |
|-------------------------------------------------------|-----------------------------------|-----------------------------------|-------------------|-----------|------------------|
| CTX-M Group 1 <sup>a</sup>                            | GCGTGATACCACTTCACCTC              | TGAAGTAAGTGACCAGAATC              | 540–559           | 780–779   | 260              |
| CTX-M Group 2 <sup>a</sup>                            | TGATACCACCACGCCGCTC               | TATTGCATCAGAAACCGTGGG             | 543–561           | 863–883   | 341              |
| CTX-M Groups 8 and 25/26 <sup>a</sup>                 | CAATCTGACGTTGGGCAATG              | ATAACCGTCGGTGACAATT               | 582–601           | 855–873   | 207              |
| CTX-M Group 9 <sup>a</sup>                            | ATCAAGCCTGCCGATCTGGTTA            | GTAAGCTGACGCAACGTCTGC             | 298–319           | 570–590   | 293              |
| CTX-M-1 <sup>b</sup>                                  | GACTATTTCATGTTGTTGTTATTTT         | TTACAAACCGTTGGTGACG               |                   |           | 923              |
| CTX-M-2 <sup>c</sup>                                  | ATGATGACTCAGAGCATTCTG             | TCAGAAACCGTGGGTTACGA              | 1–20              | 876–857   | 876              |
| CTX-M-9 <sup>c</sup>                                  | ATGGTGACAAAGAGAGTGAACGG           | TCACAGCCCTTCGGCGATGATTCT          | 132–155           | 1007–984  | 876              |
| MOX-1, MOX-2, CMY-1,<br>CMY-8 to CMY-11 <sup>d</sup>  | GCTGCTCAAGGAGCACAGGAT             | CACATTGACATAGGTGTGGTGC            | 358–378           | 877–856   | 520              |
| LAT-1 to LAT-4, CMY-2 to<br>CMY-7, BIL-1 <sup>d</sup> | TGGCCAGAACTGACAGGCCAAA            | TTTCTCCTGAACGTGGCTGGC             | 478–498           | 939–919   | 462              |
| DHA-1, DHA-2 <sup>d</sup>                             | AACTTTCACAGGTGTGCTGGGT            | CCGTACGCATACTGGCTTTGC             | 1244–1265         | 1648–1628 | 405              |
| ACC <sup>d</sup>                                      | AACAGCCTCAGCAGCCGGTTA             | TTCGCCGAATCATCCCTAGC              | 861–881           | 1206–1186 | 346              |
| MIR-1T, ACT-1 <sup>d</sup>                            | TCGGTAAAGCCGATGTTGCGG             | CTTCCACTGCGCGTCCAGTT              | 1115–1135         | 1416–1396 | 302              |
| FOX-1 to FOX-5b <sup>d</sup>                          | AACATGGGGTATCAGGGAGATG            | CAAAGCGCGTAACCGGATTGG             | 1475–1496         | 1664–1644 | 190              |
| CMY-1 <sup>c</sup>                                    | ATGCAACAACGACAATCCATCCTG          | TCAACCGGCCAACTGCGCCAGGAT          | 333–356           | 1481–1458 | 1149             |
| CMY-2 <sup>c</sup>                                    | ATGATGAAAAAATCGTTATGCT            | TTATTGCAGCTTTTCAAGAATGCG          | 1924–1945         | 3069–3046 | 1146             |
| <i>bla</i> TEM <sup>c</sup>                           | ATGAGTATTCAACATTTTCG              | TTACCAATGCCTAATCAGTG              | 215–234           | 1075–1066 | 861              |
| <i>bla</i> SHV <sup>c</sup>                           | ATGCGTTATATTCGCCCTGTG             | TTAGCGTTGCCAGTGCTCGA              | 6–25              | 866–847   | 861              |
| <i>adk</i> <sup>e</sup>                               | TCATCATCTGCACTTCCGC               | CCAGATCAGCGCAACTTCA               | 6261–6280         | 7026–7007 | 766              |
| <i>fumC</i> <sup>e</sup>                              | TCACAGGTCGCCAGCGCTTC              | TCCCGGCAGATAAGCTGTGG              | 3798–3817         | 4566–4547 | 769              |
| <i>gyrB</i> <sup>e</sup>                              | TCGGCGACACGGATGACGGC              | GTCCATGTAGGCGTTCAGGG              | 8044–8063         | 7268–7249 | 815              |
| <i>icd</i> <sup>e</sup>                               | ATGGAAGTAAAGTAGTTGTTCCGGCACA      | GGACGCAGCAGGATCTGTT               | 4346–4374         | 5223–5205 | 878              |
| <i>mdh</i> <sup>e</sup>                               | AGCGCTTCTGTTCAAATGC               | CAGGTTTCAGAACTCTCTCTGT            | 1416–1435         | 2214–2194 | 799              |
| <i>purA</i> <sup>e</sup>                              | CGCGCTGATGAAAGAGATGA              | CATACGGTAAGCCACGCAGA              | 2943–2962         | 3759–3740 | 817              |
| <i>recA</i> <sup>e</sup>                              | CGCATTGCTTTACCCTGACC              | TCGTGCAAATCTACGGACCGGA            | 0874–0894         | 1607–1586 | 734              |

References: <sup>a</sup> Xu et al., 2007; <sup>b</sup> Mena et al., 2006; <sup>c</sup> Kojima et al., 2005; <sup>d</sup> Pérez-Pérez and Hanson, 2002; <sup>e</sup> (<http://mlst.ucc.ie/mlst/dbs/Ecoli>)
